# Supplementary material for: Time-efficient syntheses of nitrogen and sulfur co-doped graphene quantum dots with tunable luminescence and their sensing applications
Source: Royal Society of Chemistry journal article supplement (doi:10.1039/c6ra05175h), 2016-01-01
Supplement: c6ra05175h1.pdf [file c6ra05175h1.pdf]

## Supplementary information:

### *Time-efficient syntheses of nitrogen and sulfur co-doped graphene quantum dots with tunable luminescence and their sensing applications*

Hongbo Xu,<sup>ab</sup> Shenghai Zhou,<sup>a</sup> Lili Xiao,<sup>ab</sup> Qunhui Yuan<sup>\*a</sup> and Wei Gan<sup>\*a</sup>

<sup>a</sup>Laboratory of Environmental Sciences and Technology, Xinjiang Technical Institute of Physics and Chemistry; Key Laboratory of Functional Materials and Devices for Special Environments, Chinese Academy of Sciences, 40-1 Beijing Road, Urumqi, Xinjiang, 830011, China

<sup>b</sup>University of Chinese Academy of Sciences, No.19A Yuquan Road, Beijing, 100049, China

\*Author to whom correspondence should be addressed.

Tel: +86-(0)991-3677875; Fax: +86-(0)991-3838957

E-mail: yuanqh@ms.xjb.ac.cn and ganwei@ms.xjb.ac.cn

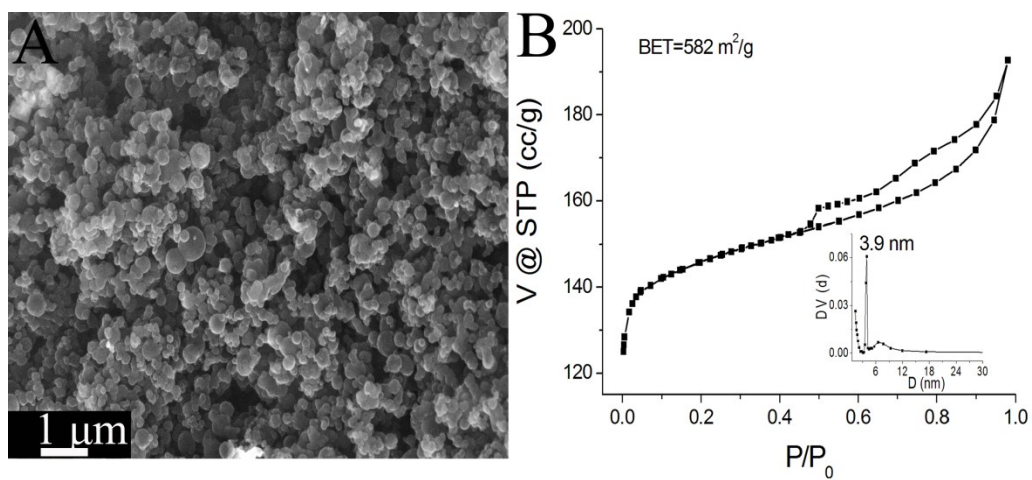

**Figure S1.** SEM image (A), nitrogen adsorption isotherm (B) and the size distribution (inset of B) of the porous polythiophene-derived carbon precursor.

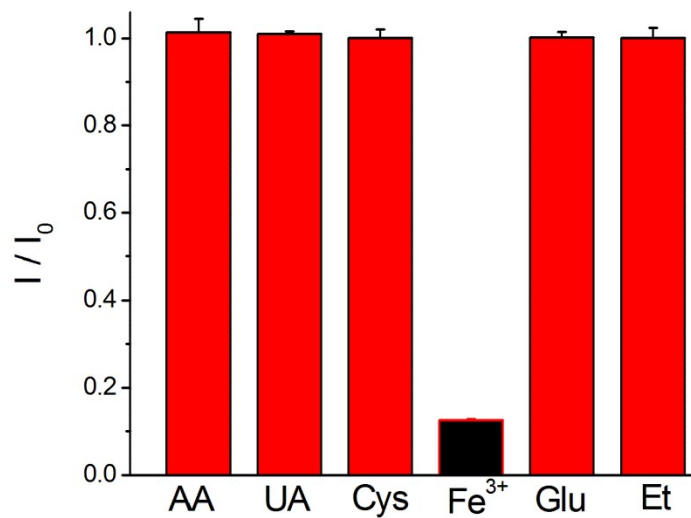

**Figure S2.** Effects of different biomolecules and  $Fe^{3+}$  on the relative fluorescence intensity of the GQDs solution. From left to right: 100  $\mu$ M ascorbic acid (AA), 100  $\mu$ M uric acid (UA), 100  $\mu$ M cysteine (Cys), 100  $\mu$ M  $Fe^{3+}$ , 4 mM glucose (Glu) and 10 mM ethanol (Et).

**Table S1.** Determination of Fe<sup>3+</sup> in tap water samples with the N,S-GQD<sub>180</sub>. (n=3)

|          | Detected<br>( $\mu\text{M}$ ) | Added<br>( $\mu\text{M}$ ) | Detected<br>( $\mu\text{M}$ ) | Recovery<br>(%) | RSD<br>(%) |
|----------|-------------------------------|----------------------------|-------------------------------|-----------------|------------|
| Sample 1 | 0                             | 30                         | 26.5                          | 88.3%           | 1.9%       |
| Sample 2 | 0                             | 50                         | 50.8                          | 101.6%          | 3.0%       |
| Sample 3 | 0                             | 100                        | 100.5                         | 100.5%          | 2.8%       |
